## Announcement

---

---

### **C.E. Alken Prize**

C.E. Alken Foundation Council  
Bern, January 2000

The C.E. Alken Foundation supports clinical and experimental research through an annual prize for outstanding scientific work.

The C.E. Alken Prize is awarded for the best unpublished scientific work in the field of urology and may be divided. The prize comprises a certificate and the sum of CHF 10,000.

Manuscripts can be submitted in either English or German. Five copies of the manuscript should be sent to the following address:

Mrs Jutzi  
C.E. Alken Foundation  
Dr. F. Kellerhals  
Marktgasse 55  
CH-3011 Bern (Switzerland)

The deadline for submission of manuscripts is September 30, 2000. Each paper has to be marked with a code word and must not include the name of the author. An additional sealed envelope (marked on the outside with the code word) has to be enclosed and must disclose surname, first name, professional status and present position of the author, and the manuscript's code word.

The award winner will be determined by the Foundation Council, whose decision is final.
